# Supplementary material
Source: Springer Nature journal article supplement (https://www.springermedizin.de/resource/supplementary/12943_2014_1405_MOESM2_ESM.pdf/9552926)

A

$$\text{Ratio IdU / CldU} = \frac{\text{IdU track size}}{\text{CldU track size}}$$

CldU IdU IdU CldU



IdU track < CldU track  
= smaller ratio

IdU track > CldU track  
= higher ratio

Acceleration and deceleration of replication forks

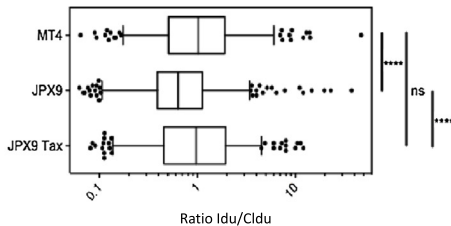

B

CldU IdU IdU CldU



Labelled region

Labelled region

Distance center to center = distance between centers of two different labelled regions

Distance center to center

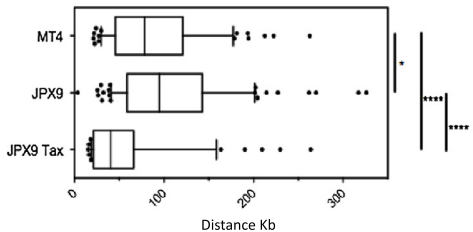

Supplement: MOESM2 [file 9552926]
